# Supplementary material for: The Origin of Behavioral Bursts in Decision-Making Circuitry
Source: PLoS Comput Biol. 2011 Jun 23;7(6):e1002075. doi: 10.1371/journal.pcbi.1002075 (PMC3121695; doi:10.1371/journal.pcbi.1002075)
Supplement: Text S1 — Supporting Material and Methods, regarding the Weibull parameters' relation to the mean IAI and to the burstiness parameter B. (PDF) [file pcbi.1002075.s008.pdf]

# Supporting Information for The Origin of Behavioral Bursts in Decision-Making Circuitry

## Supporting Material and Methods

### (a) The mean IAI is directly proportional to the scale parameter $\lambda$

The  $n$ -th moment of the Weibull distribution is of the form [1]

$$\lambda^n \Gamma(1 + n/k). \quad (S1)$$

Thus the mean is given by

$$m = \lambda \Gamma(1 + 1/k), \quad (S2)$$

that is linearly proportional to the parameter  $\lambda$ , as we wanted to show.

The dependence with the shape parameter  $k$  is through the gamma function. To get insight on this dependence consider the following approximation in the interval  $0.2 < k < 1$ ,  $\Gamma(1 + 1/k) \approx 0.25 \text{ Exp}[1.0757/k]$ , that is, the mean increases exponentially with the inverse of the shape parameter  $k$  in the region of  $k$  of experimental interest to us,  $0.2 < k < 1$ .

### (b) The burstiness parameter $B$ , when applied to the Weibull distribution, is independent of the scale parameter

Substituting Eq. (S1) for  $n=1,2$  into Eq. (2), we obtain,

$$B = \frac{(\Gamma(1 + 2/k) - \Gamma^2(1 + 1/k))^{1/2} - \Gamma(1 + 1/k)}{(\Gamma(1 + 2/k) - \Gamma^2(1 + 1/k))^{1/2} + \Gamma(1 + 1/k)}, \quad (S3)$$

that only depends on the shape parameter  $k$ . To get some intuition, we note that for the interval of  $k$  of interest in this paper,  $0.2 < k < 1$ , burstiness can be roughly approximated by  $B \approx 1.27 - 2.26k + 1.02k^2$ , that is a function that decreases monotonically with  $k$ .

## Supporting References

1. Johnson NL, Kotz S, Balakrishnan N (1994) Continuous Univariate Distributions, Vol.1. Wiley Series in Probability and Statistics.
